# Supplementary material
Source: MDPI journal article supplement (https://www.mdpi.com/2075-163X/14/5/440)
Supplement: s1 [file s1]

# Onuma Diagrams\*

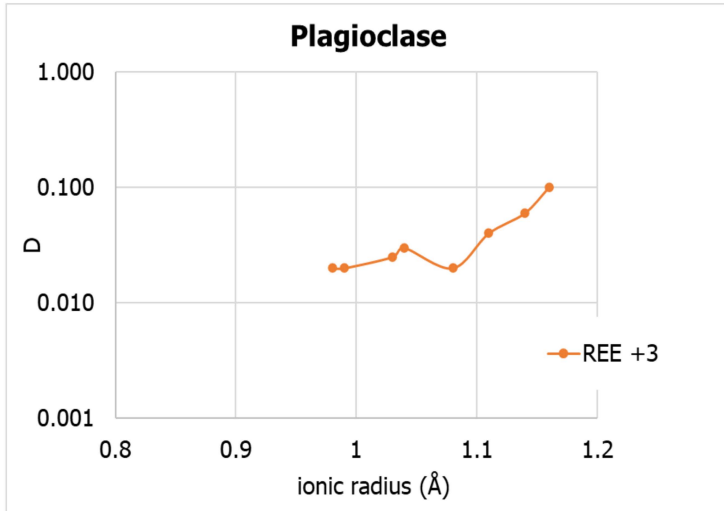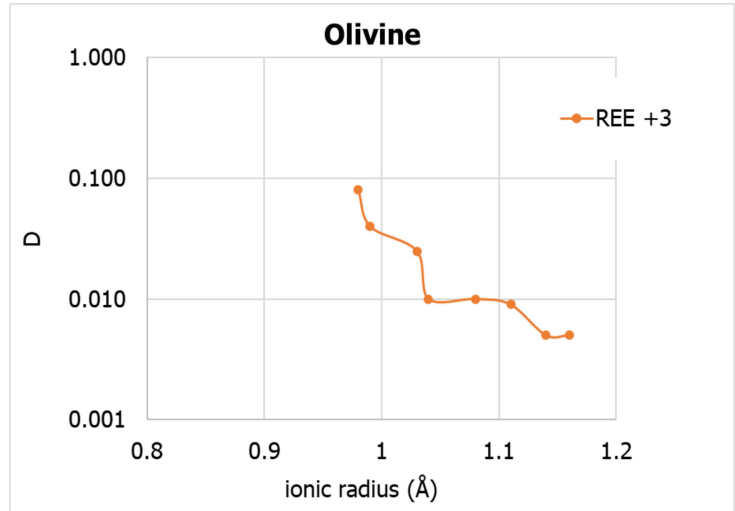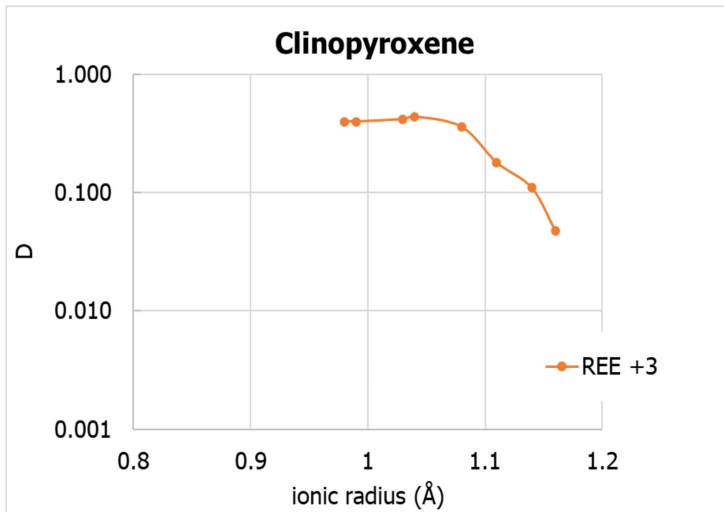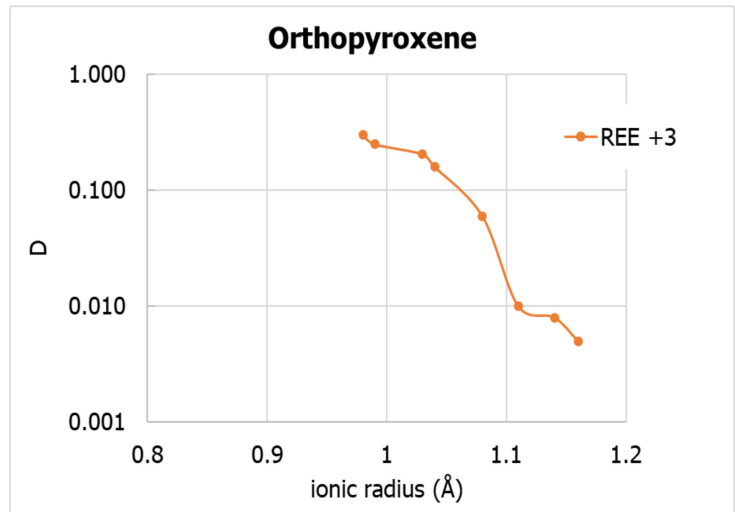

Based on partition coefficients for each mineral compiled in Table 3.1  
Partition coefficients plotted on a log(10) scale.

\* Onuma, N., Higuchi, H., Wakita, H. and Nagasawa, H., 1968. Trace element partition between two pyroxenes and the host lava. E&PSL, 5, pp.47-51.
