# Supplementary material
Source: MDPI journal article supplement (https://www.mdpi.com/2075-163X/14/5/440)

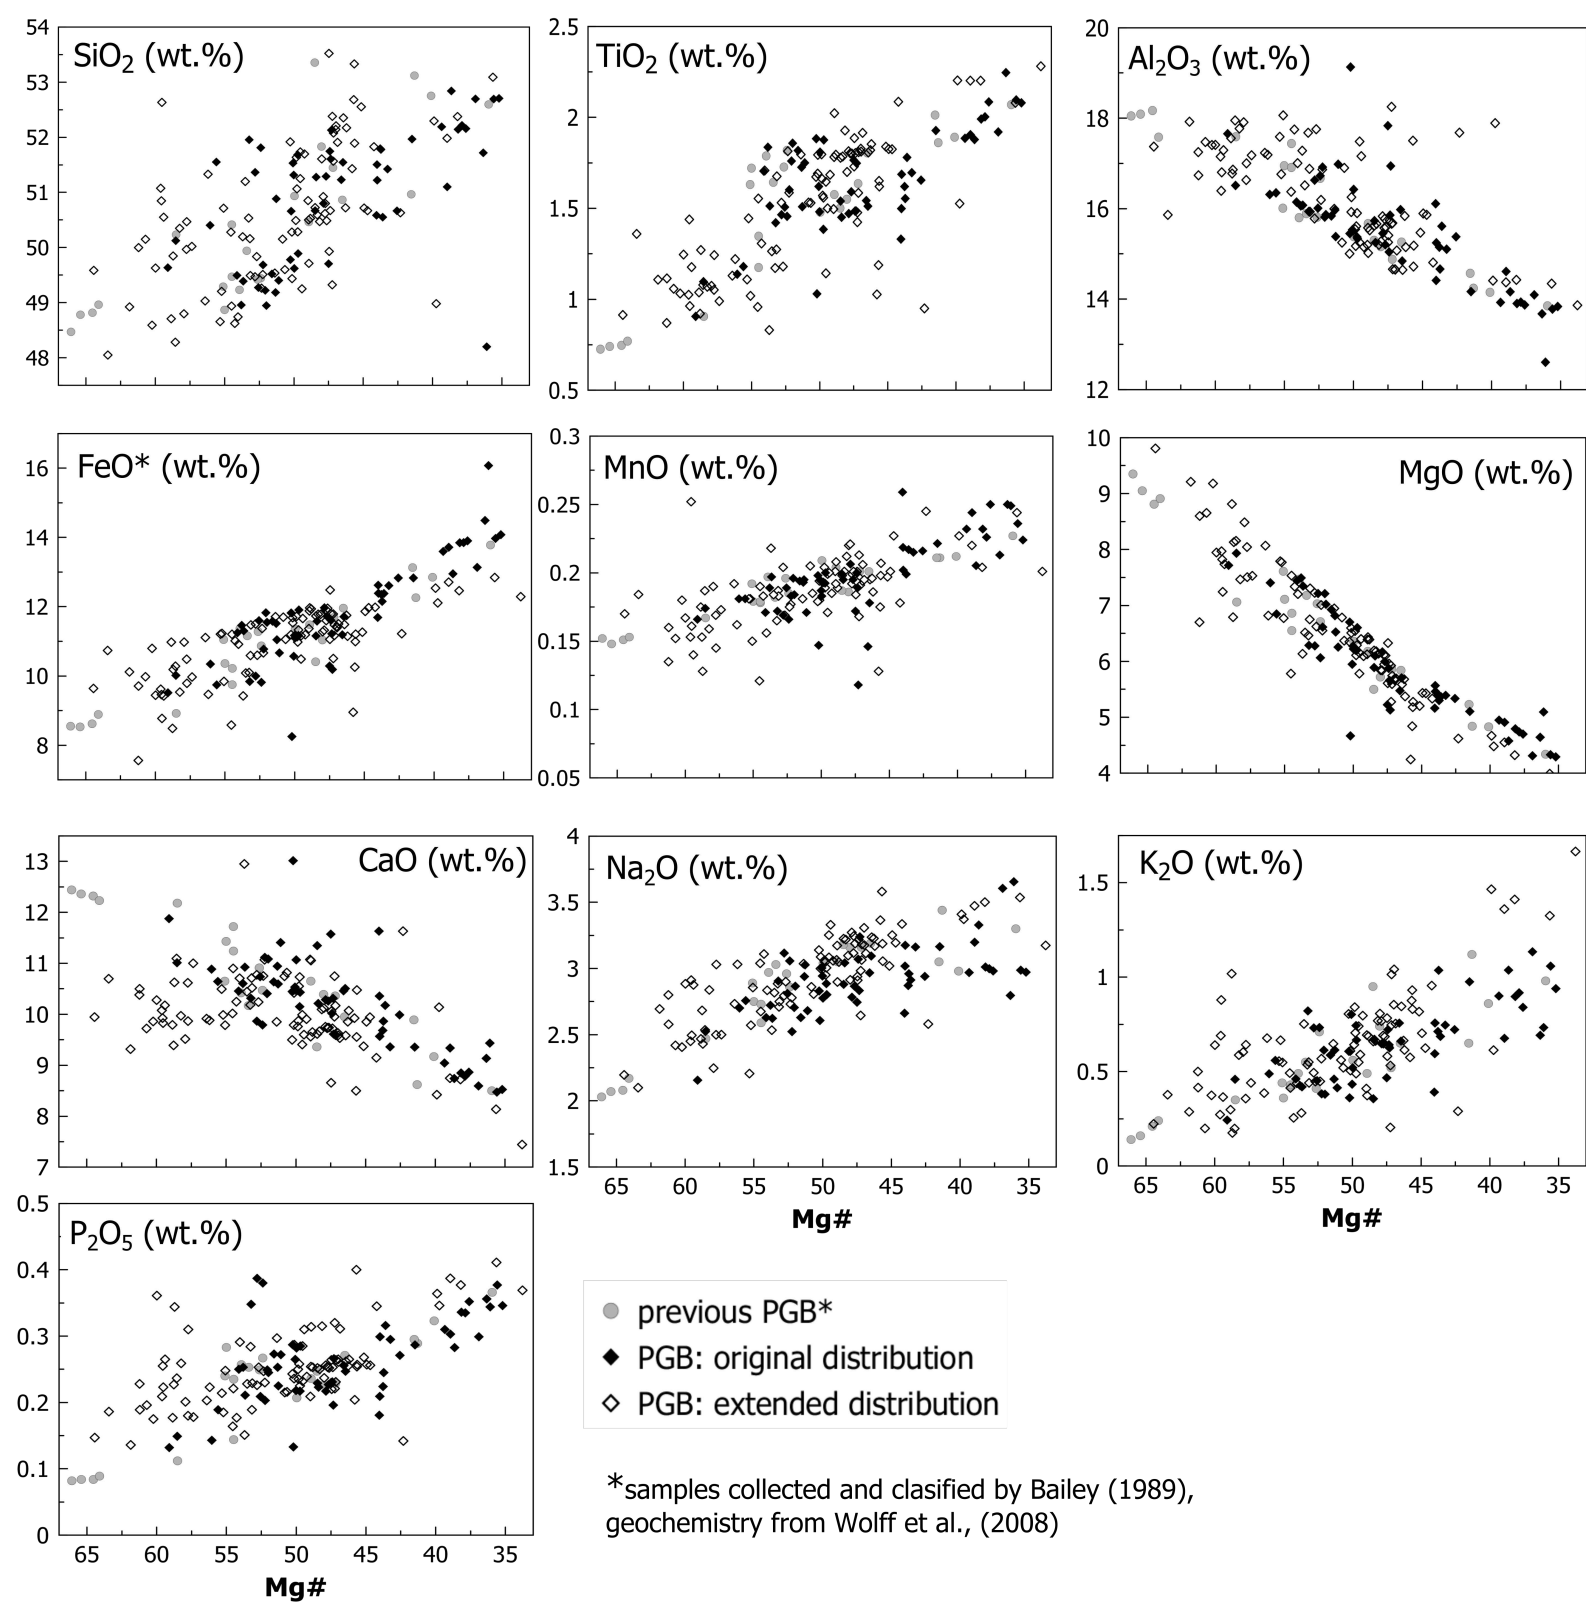

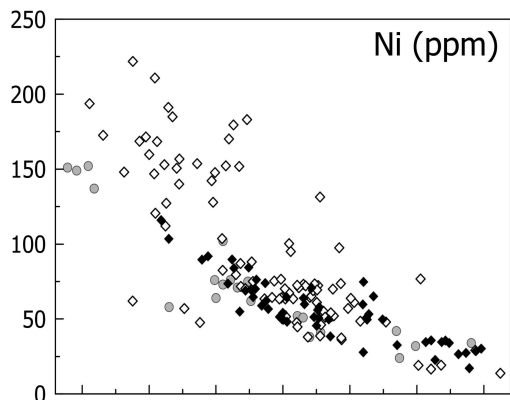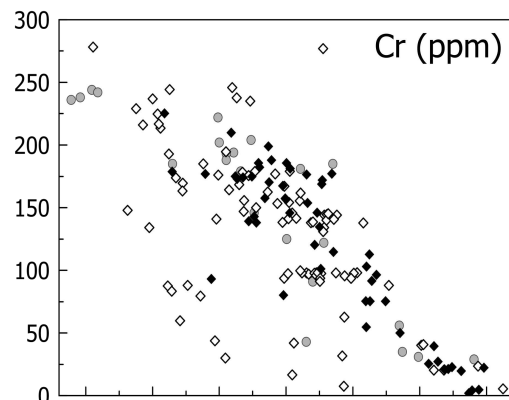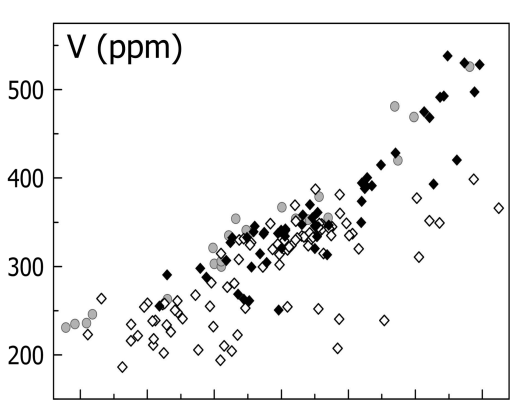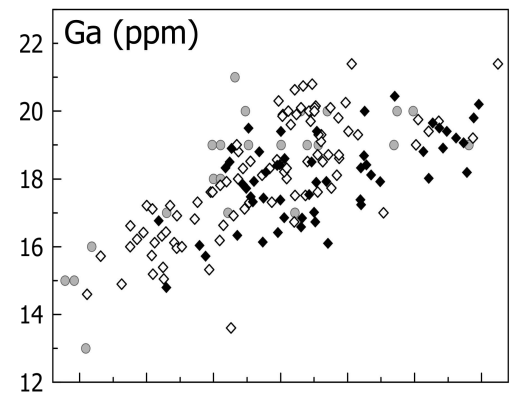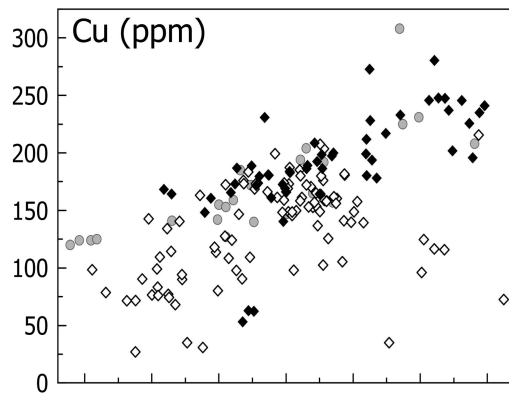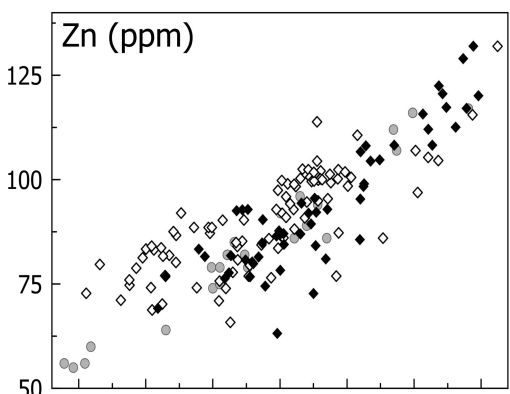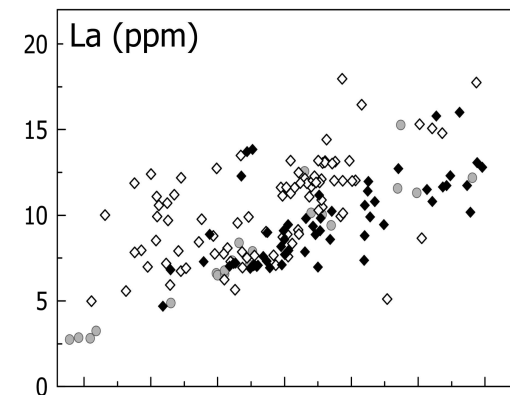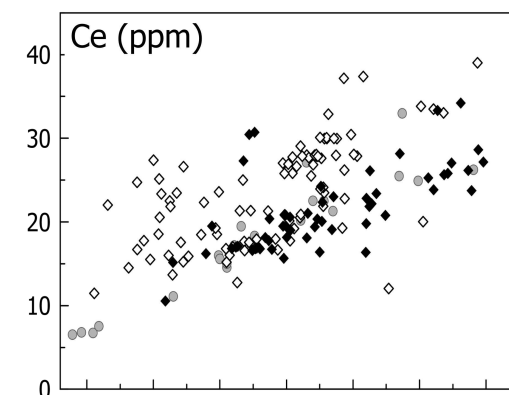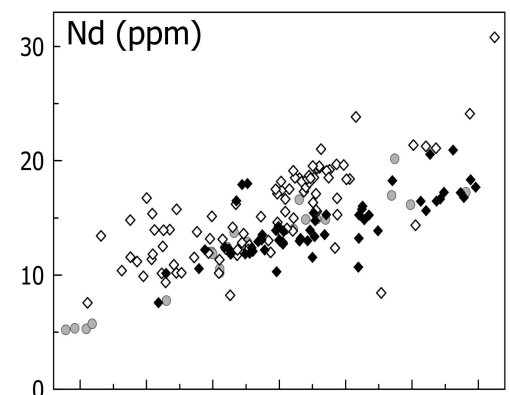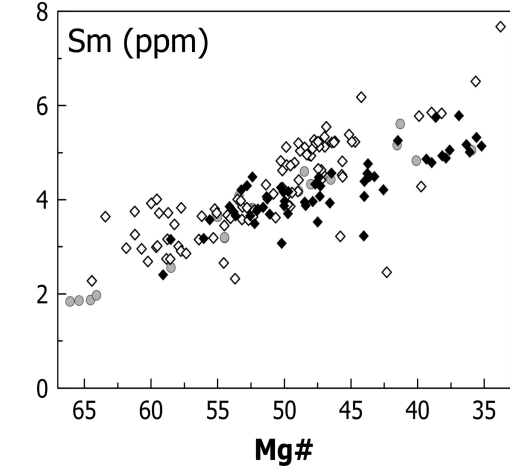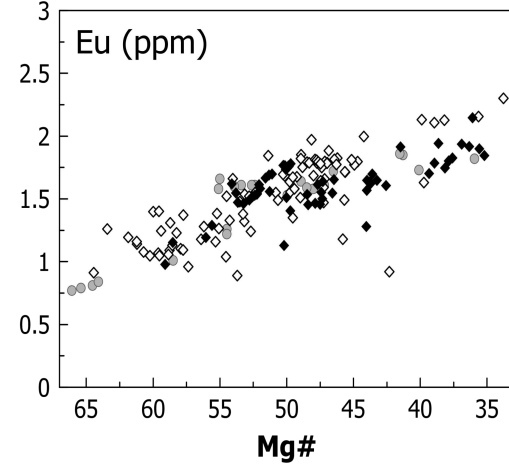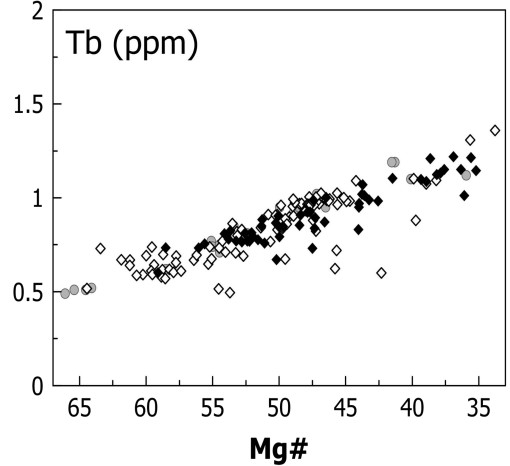

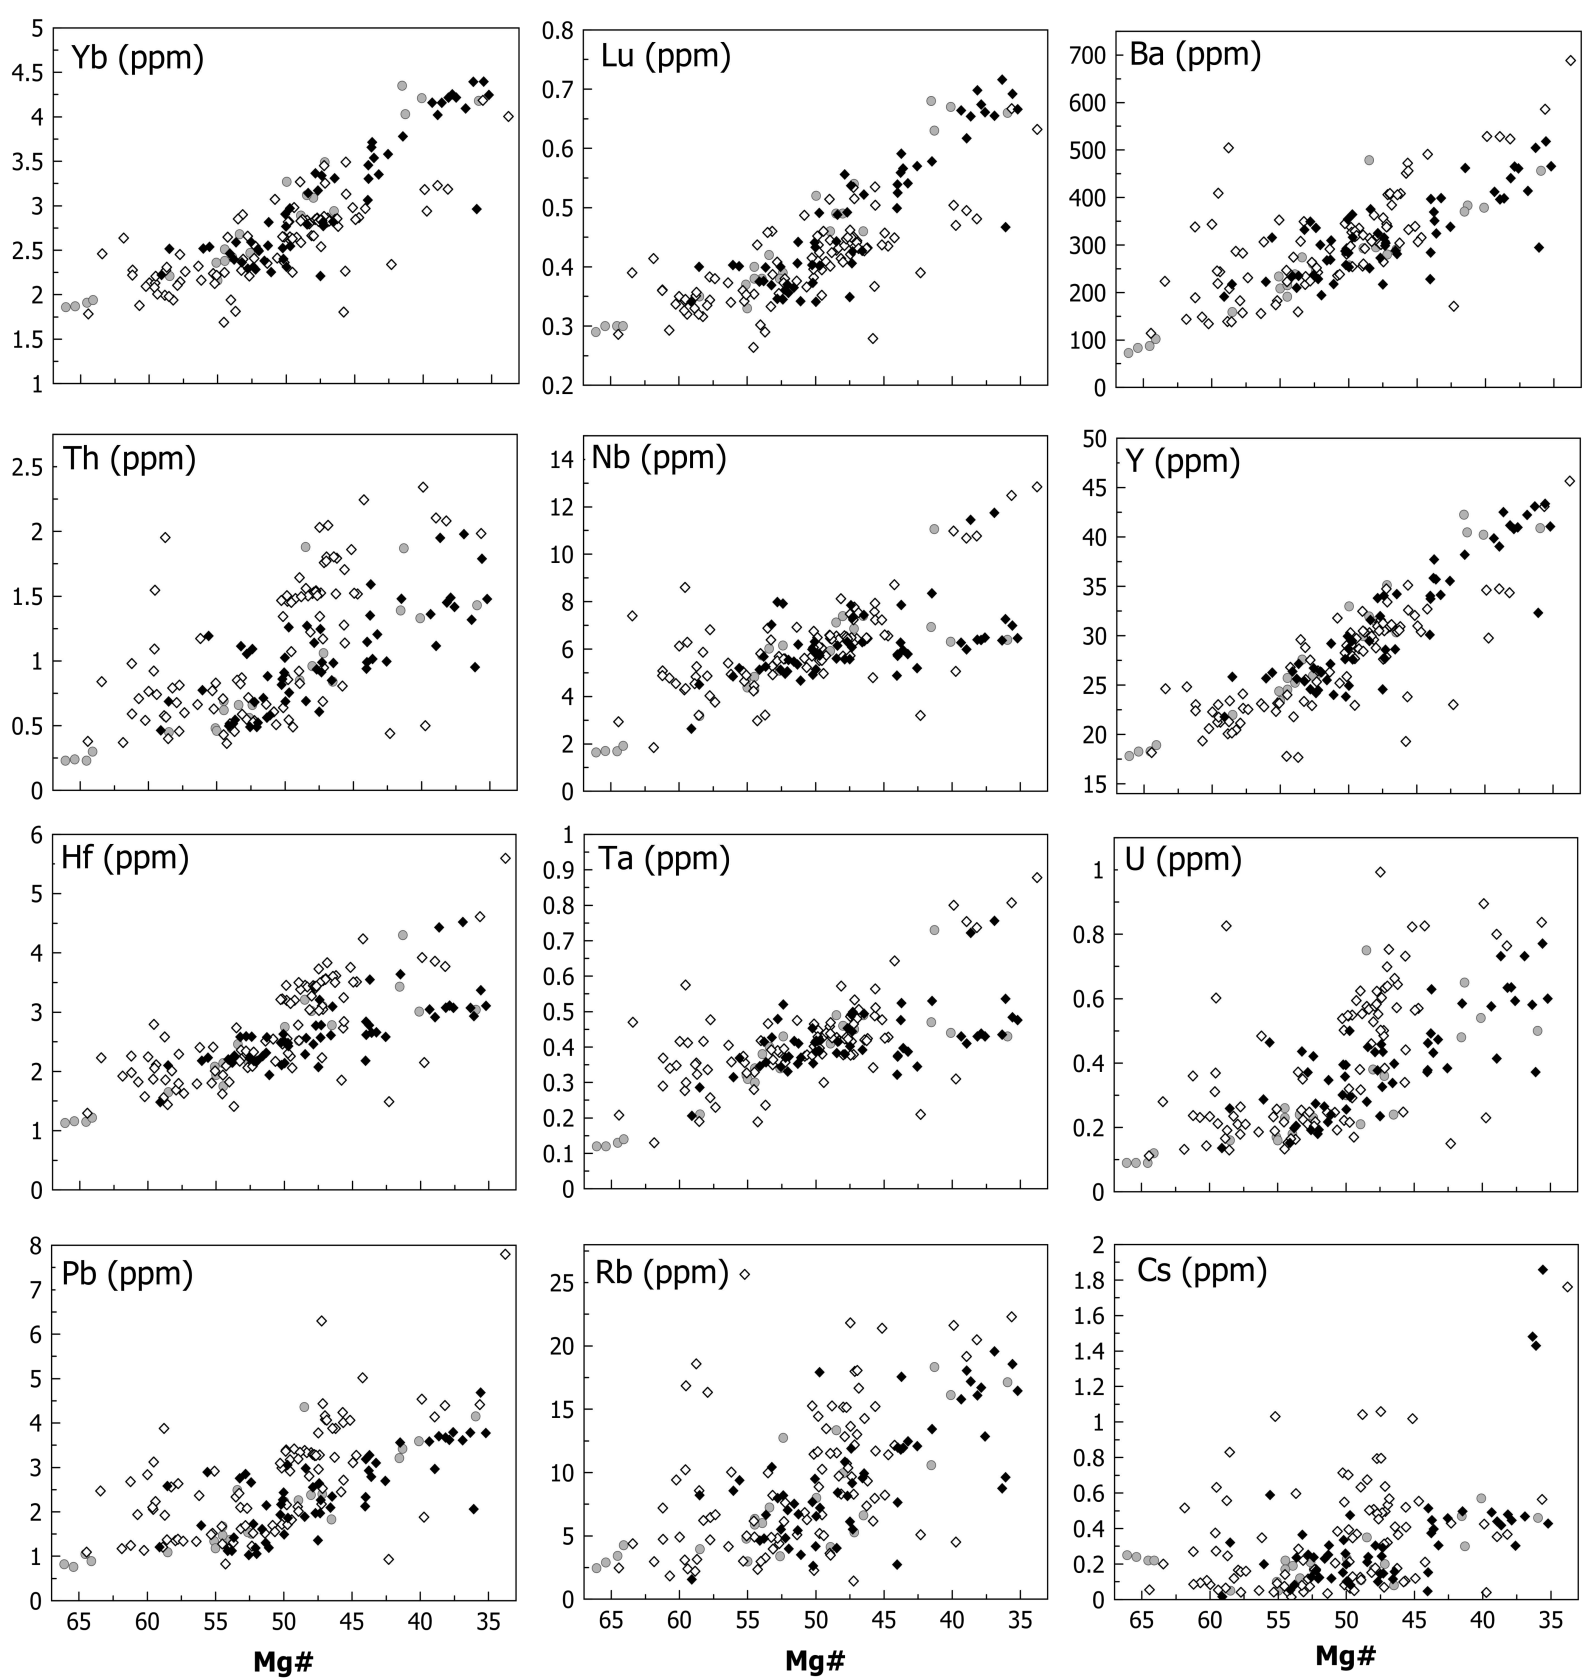

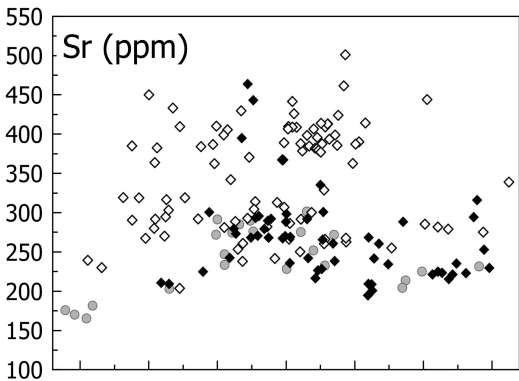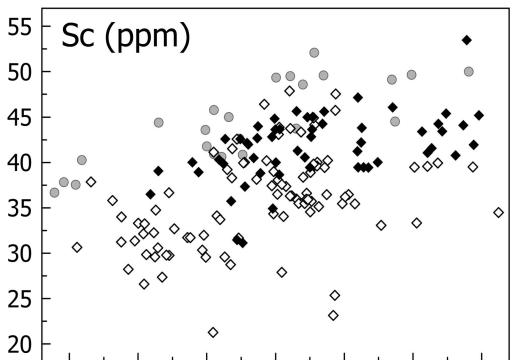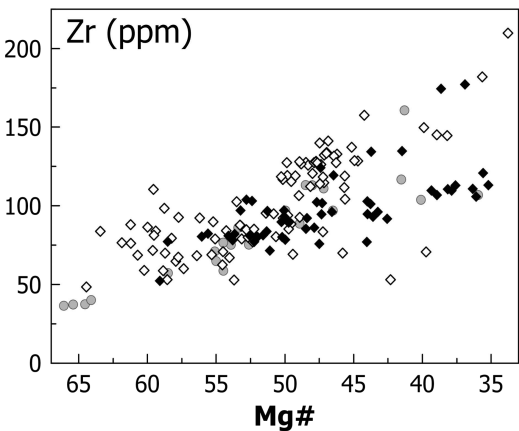

Supplement: s1 [file s1]
